# Supplementary material for: Solvation structure regulation of deep eutectic solvents: stabilization of the zinc anode in rechargeable zinc–air batteries
Source: Royal Society of Chemistry journal article supplement (doi:10.1039/d3ta07262b), 2024-01-01
Supplement: d3ta07262b1.pdf [file d3ta07262b1.pdf]

## Supporting Information

### **Solvation Structure Regulation of Deep Eutectic Solvents: Stabilize the Zinc Anode in Rechargeable Zinc-Air Batteries**

Yang Song<sup>‡</sup>,<sup>a</sup> Yongduo Liu<sup>‡</sup>,<sup>a</sup> Shijian Luo,<sup>a</sup> Yuran Yang,<sup>a</sup> Fadong Chen,<sup>a</sup> Meng Wang,<sup>a</sup> Lin Guo,<sup>\*b</sup> Siguo Chen<sup>\*a</sup> and Zidong Wei<sup>a</sup>

<sup>a</sup> College of Chemistry and Chemical Engineering, Chongqing University, State Key Laboratory of Advanced Chemical Power Sources (SKL-ACPS), Chongqing, China.

<sup>b</sup> State Key Laboratory of Catalytic Materials and Reaction Engineering, SINOPEC Research Institute of Petroleum Processing Co.100083, Beijing, China.

\*Corresponding author. Email: [csg810519@126.com](mailto:csg810519@126.com); [guolin.ripp@sinopec.com](mailto:guolin.ripp@sinopec.com);

<sup>‡</sup> These authors contributed equally to this work.

## Results and Discussion

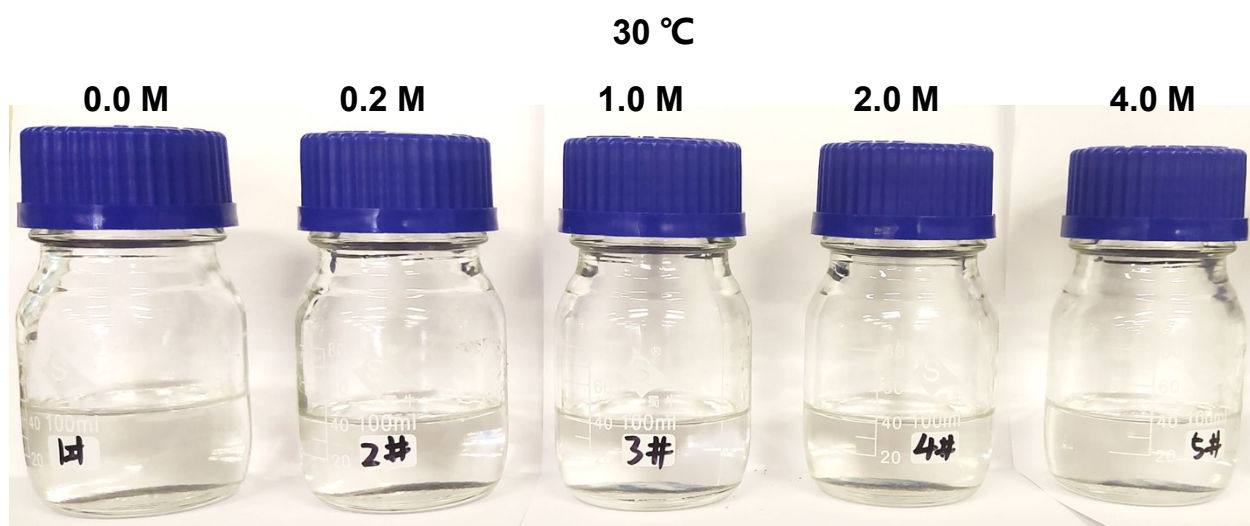

**Fig. S1** The optical photographs of different  $C_{\text{ZnCl}_2}$  electrolyte at 30°C

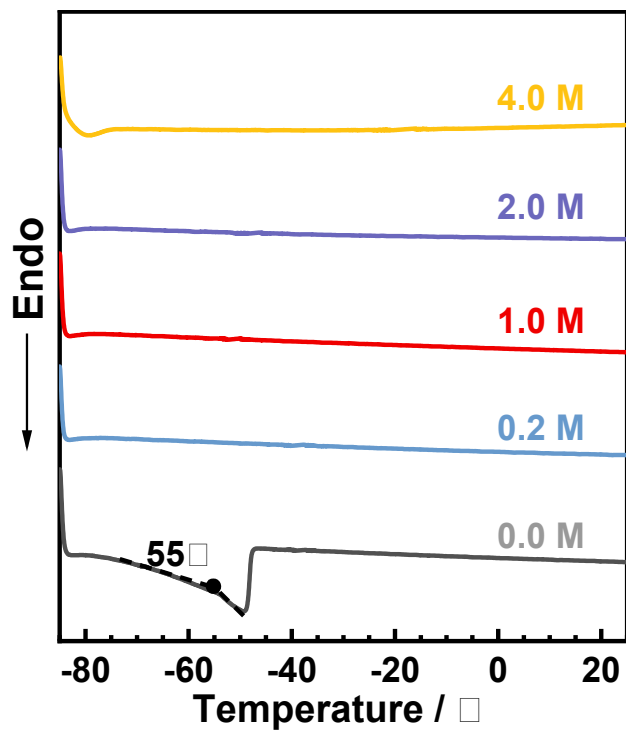

**Fig. S2** DSC test from -85 to 25 °C at a scan rate of 2 °C/min;

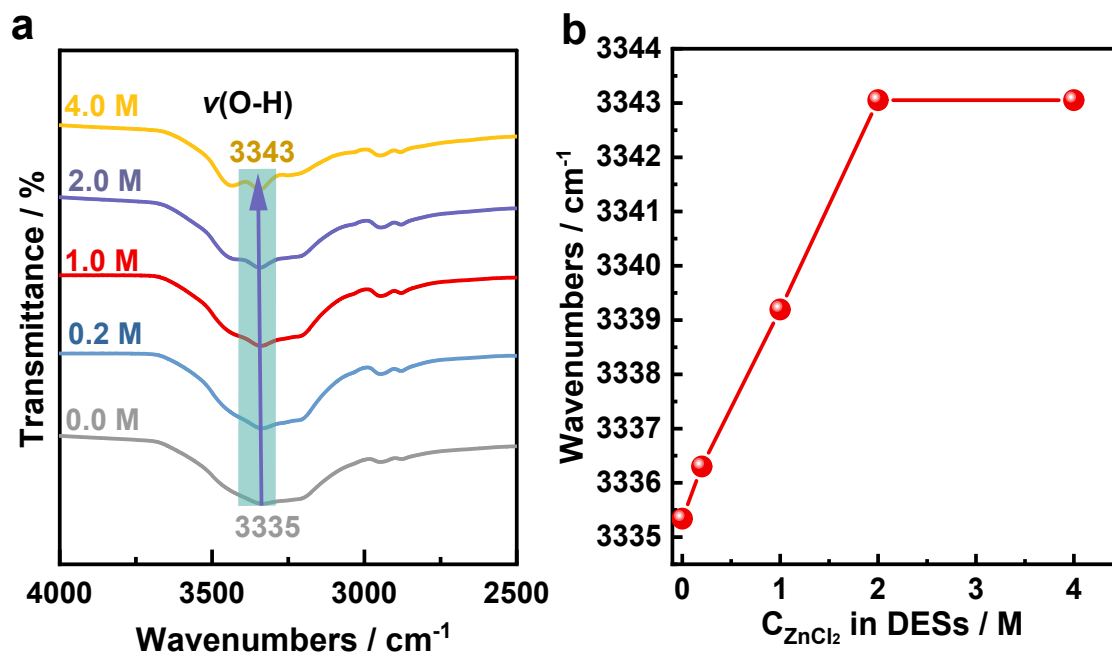

Fig. S3 a) FTIR spectra and b) peak position of O-H stretch vibration band as a function of the  $C_{\text{ZnCl}_2}$

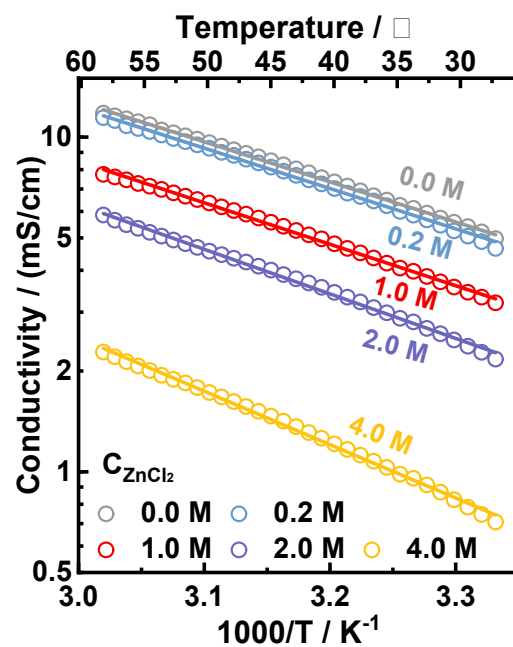

Fig. S4 Temperature (T) dependence of ionic conductivity of various  $C_{\text{ZnCl}_2}$ ;

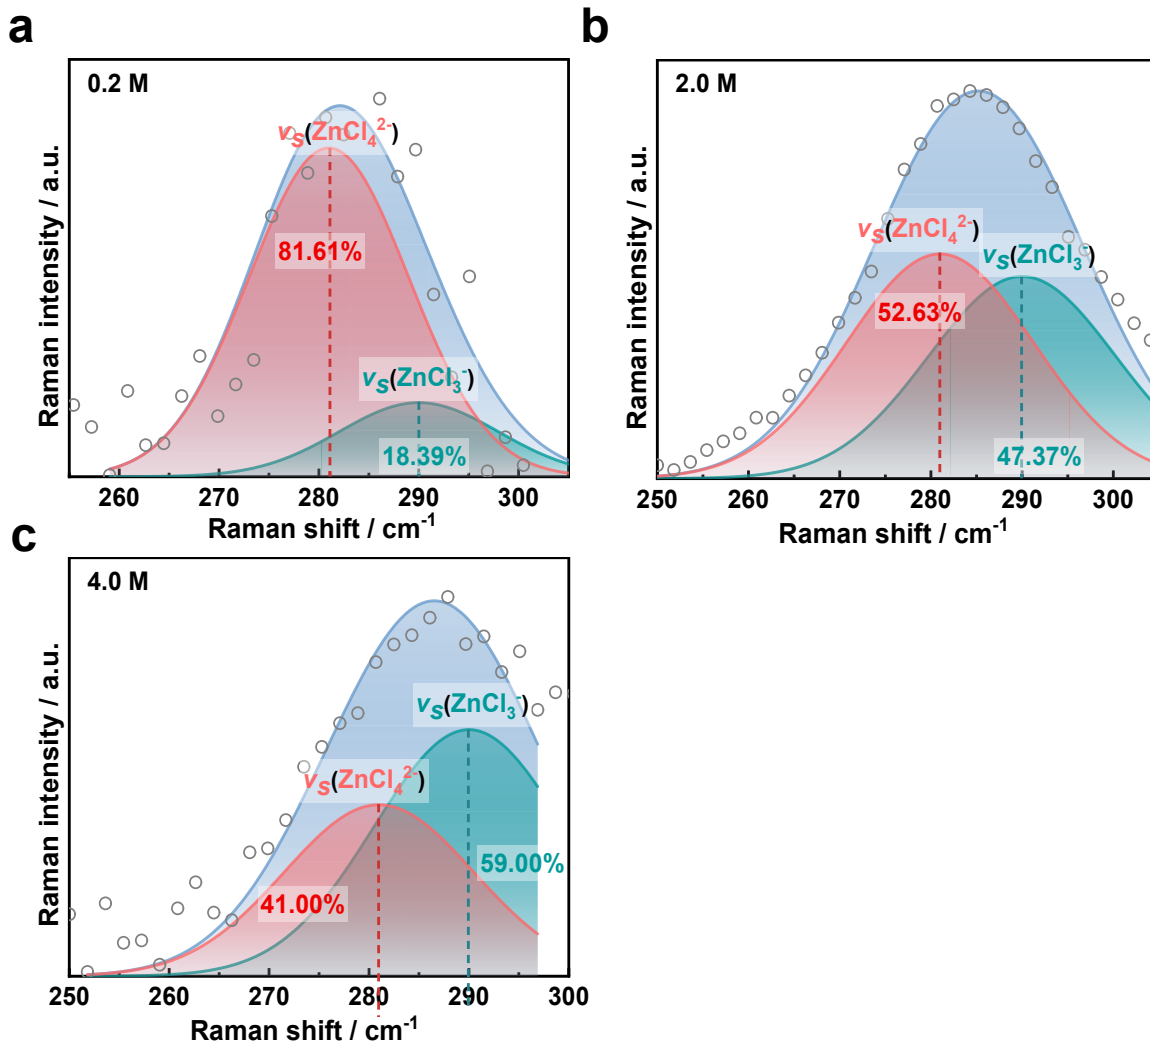

Fig. S5 The Raman spectra fitted peaks of various  $\text{C}_{\text{ZnCl}_2}$  electrolyte: a) 0.2 M; b) 2.0 M; c) 4.0 M;

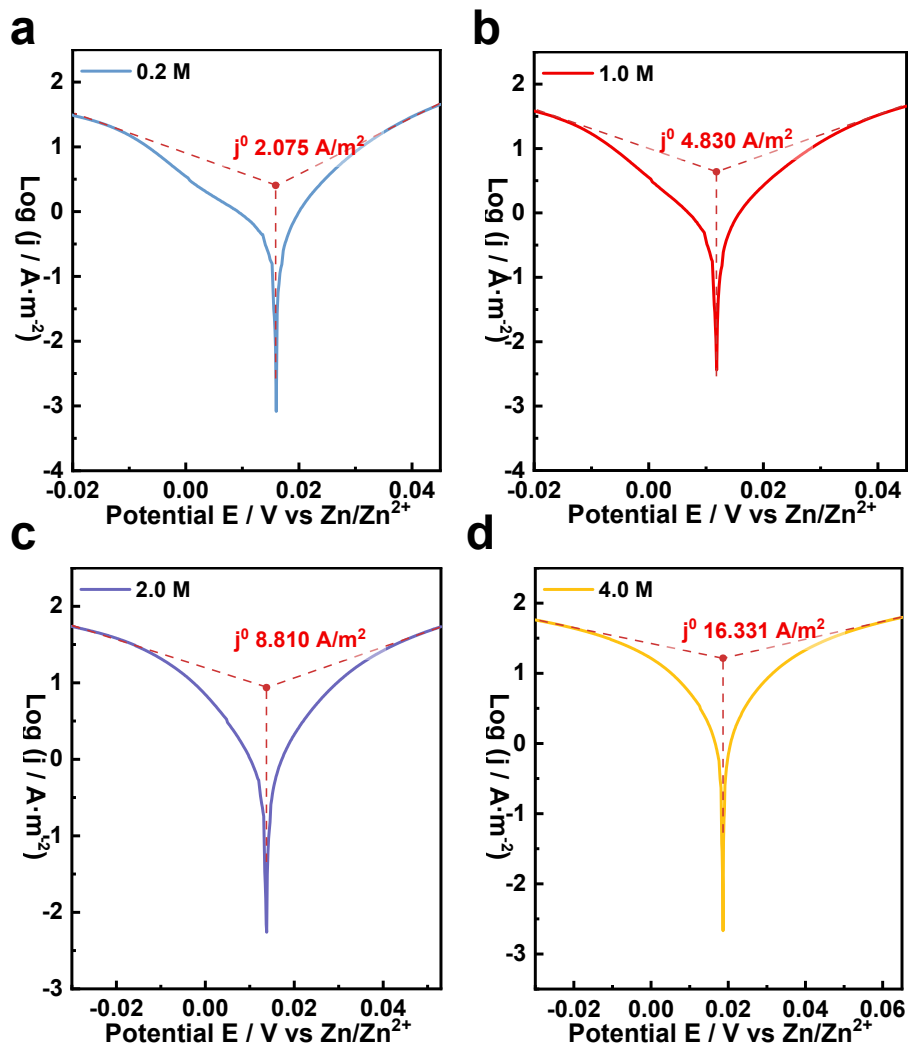

**Fig. S6** The tafel curves for Zn electrode in various  $\text{C}_{\text{ZnCl}_2}$  electrolytes, a) 0.2 M; b) 1.0 M; c) 2.0 M; d) 4.0 M

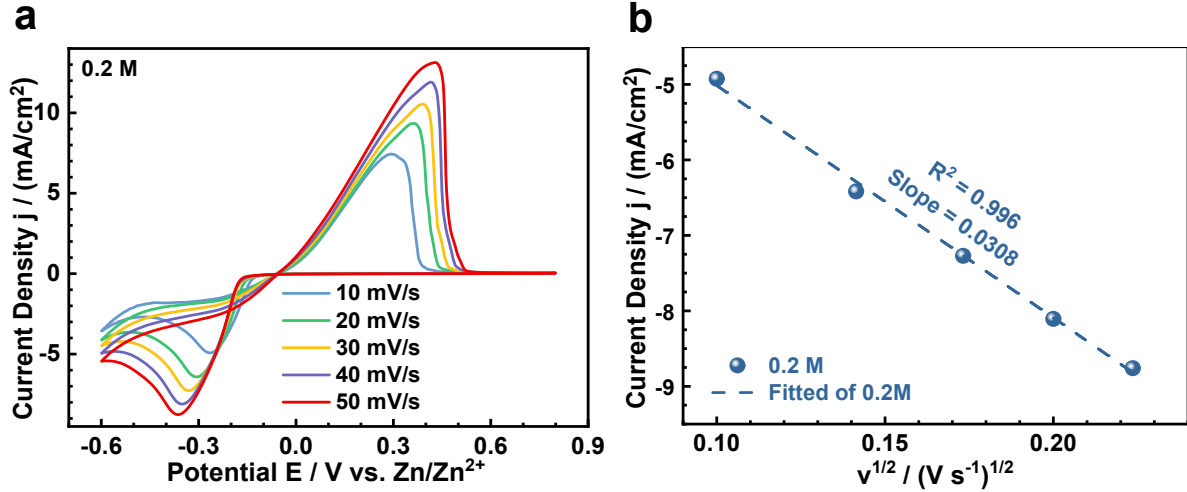

**Fig. S7** a) The CV curves of W wire electrode in 0.2 M  $\text{ZnCl}_2$  with different scan rates; b) Relationships between cathodic peak current density ( $j_{pc}$ ) and square root of scan rate ( $v^{1/2}$ ) calculated from a)

For a quasi-reversible charge transfer process, the diffusion coefficient of Zn(II) can be determined by the irreversible Randles-Sevcik Eq-1<sup>1</sup>, which is also applicable to the quasi-reversible systems<sup>2,3</sup>,

$$j_p = 0.4958nFAC_{\text{Zn(II)}}D_{\text{Zn(II)}}^{1/2} \left( \frac{\alpha n_\alpha Fv}{RT} \right)^{1/2}$$

where  $j_p$  is the cathodic peak current,  $n$  is the number of exchanged electrons,  $F$  is the Faraday constant,  $A$  is the electrode area,  $C_{\text{ZnCl}_2}$  is the  $\text{ZnCl}_2$  concentration,  $D_{\text{ZnCl}_2}$  is the diffusion coefficient of Zn species,  $\alpha$  is the transfer coefficient,  $n_\alpha$  is the electron transfer number in the rate-determining step,  $v$  is the scan rate,  $R$  is the gas constant,  $T$  is the absolute temperature. The average transfer coefficient can be calculated as 0.34.<sup>4</sup>

Subsequently, the diffusion coefficients were calculated for other  $C_{\text{ZnCl}_2}$  using the Nernst-Einstein equation.<sup>5</sup>

$$\kappa = \frac{C_i D_i Z_i F^2}{t_i RT}$$

$C_i$  the concentration of active ion,  $\text{mol}\cdot\text{L}^{-1}$ ;  $D_i$  diffusion coefficient of active ion,  $\text{cm}^2\cdot\text{s}^{-1}$ ;  $Z_i$  the charge number of active ion,  $F$  the Faraday constant,  $96485 \text{ C}\cdot\text{mol}^{-1}$ ;  $t_i$  ion mobility number;



**Table S1** Physicochemical properties of different  $C_{ZnCl_2}$  electrolytes.

| Item  | $C / \text{mol} \cdot \text{m}^{-3}$ | $E^0 / \text{mV}$ | $j^0 / \text{Am}^{-2}$ | Ionic conductivity /<br>$\text{S} \cdot \text{m}^{-1}$ | Diffusion coefficient<br>$\text{m}^2 \cdot \text{s}^{-1}$ |
|-------|--------------------------------------|-------------------|------------------------|--------------------------------------------------------|-----------------------------------------------------------|
| 0.2 M | 200                                  | 15.997            | 2.075                  | 0.5245                                                 | 2.76E-11                                                  |
| 1.0M  | 1000                                 | 11.9567           | 4.830                  | 0.3565                                                 | 8.39E-12                                                  |
| 2.0M  | 2000                                 | 13.931            | 8.810                  | 0.2475                                                 | 4.12E-12                                                  |
| 4.0M  | 4000                                 | 10.925            | 16.331                 | 0.0825                                                 | 9.71E-13                                                  |

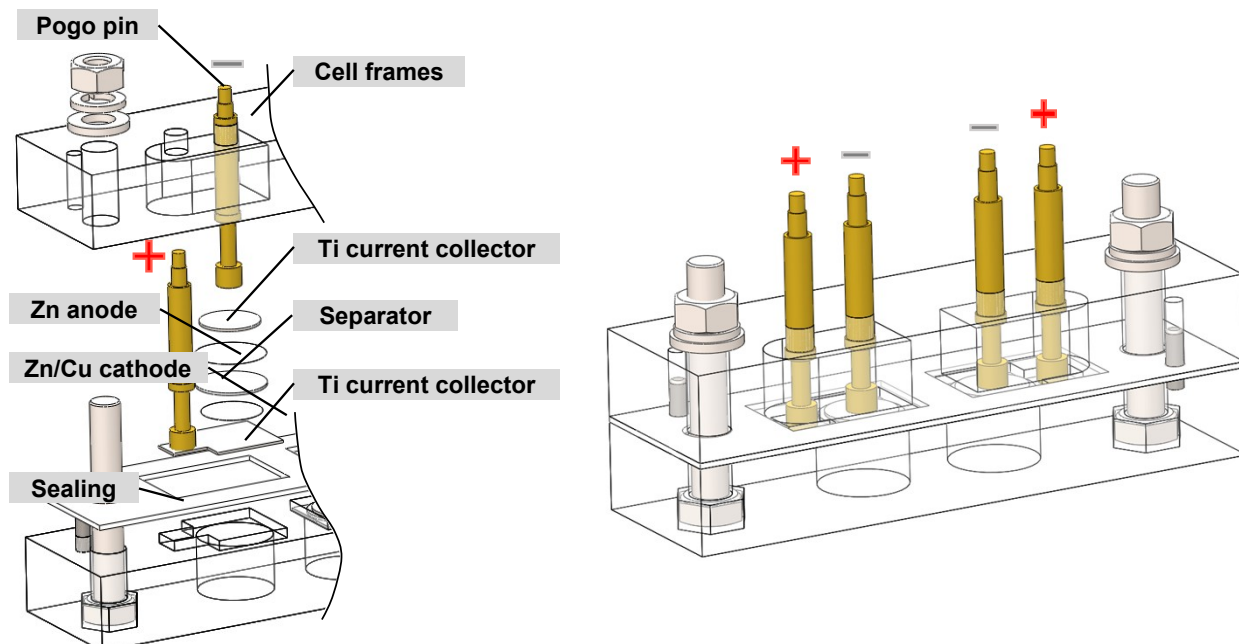

**Fig. S8** The schematic drawing of Zn/Cu||Zn cell

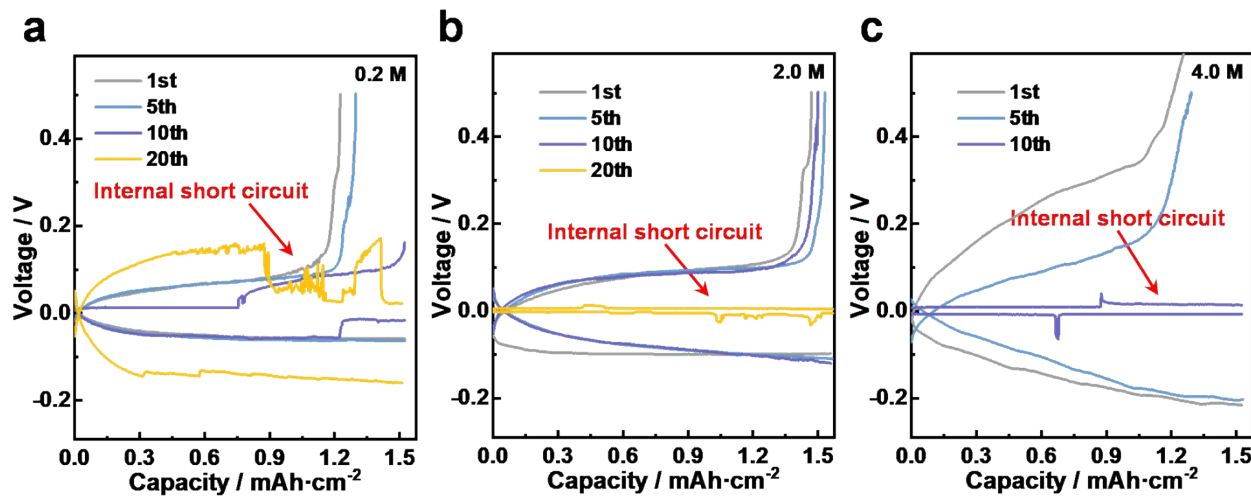

**Fig. S9** Voltage profiles of the Cu||Zn cell at different cycles of  $C_{\text{ZnCl}_2}$  at: a) 0.2 M; b) 2.0 M, and c) 4.0 M;

**Table S2** Comparison of over-potential, viscosity, and ionic conductivity of 1.0 M ZnCl<sub>2</sub> with

| Electrolyte composition                                   | Current density<br>mA·cm <sup>-2</sup> | Over-potential<br>mV | Viscosity<br>mPa·s | Ionic conductivity<br>mS·cm <sup>-1</sup> | Reference                                                  |
|-----------------------------------------------------------|----------------------------------------|----------------------|--------------------|-------------------------------------------|------------------------------------------------------------|
| 1.0M ZnCl <sub>2</sub> ChCl-2Urea-2EG                     | <b>1</b>                               | <b>33</b>            | <b>69.2</b>        | <b>3.56</b>                               | <i>This Work</i>                                           |
| ZnCl <sub>2</sub> -4EG                                    | 1                                      | 125.9                | 126.73             | 1.15                                      | <i>Angew Chem Int Edit</i> <b>2022</b> , 61. <sup>6</sup>  |
| Zn(TFSI) <sub>2</sub> -7Acetamide                         | 0.1                                    | 55                   | 798                | 0.31                                      | <i>Nat. Commun.</i> <b>2019</b> , 10. <sup>7</sup>         |
| LiTFSI-20Zn(TFSI) <sub>2</sub> -3.8Urea/2H <sub>2</sub> O | 0.1                                    | 69.1                 | 139                | 1.85                                      | <i>Nano Energy</i> <b>2019</b> , 57, 625-634. <sup>8</sup> |
| 30 m ZnCl <sub>2</sub> + 15 m ChCl H <sub>2</sub> O       | 0.2                                    | 35                   | 220.8              | 1.255                                     | <i>Chem. Eng. J.</i> <b>2023</b> , 456. <sup>9</sup>       |
| ZnCl <sub>2</sub> :acetamide:H <sub>2</sub> O is 1:3:1    | 0.1                                    | 65                   | 250                | 1.1                                       | <i>Adv. Funct. Mater.</i> <b>2021</b> , 31. <sup>10</sup>  |

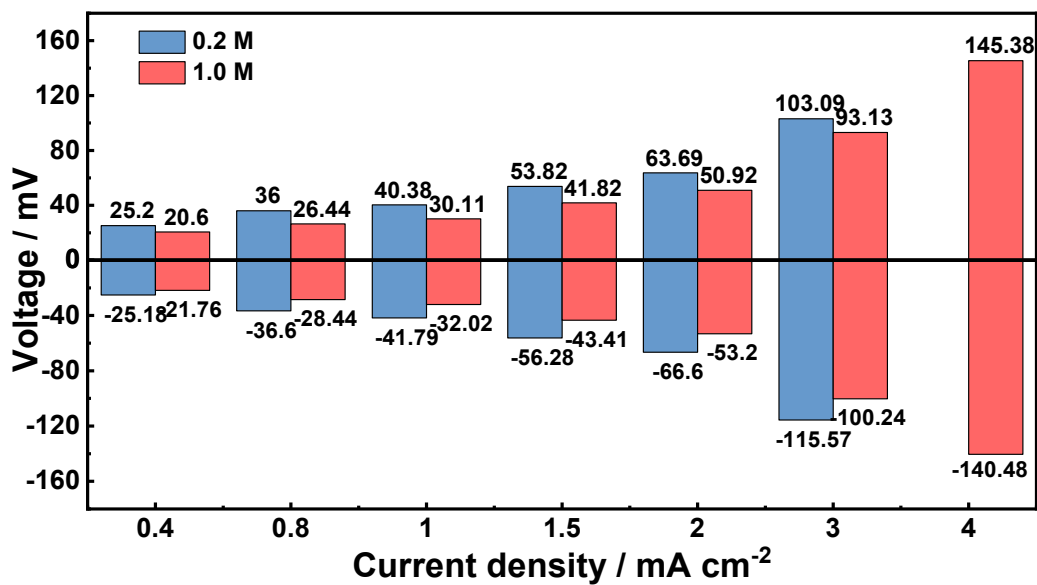

Fig. S10 Over-potential of Zn||Zn symmetric cells at current densities from 0.4 to 4.0 mA·cm<sup>-2</sup>

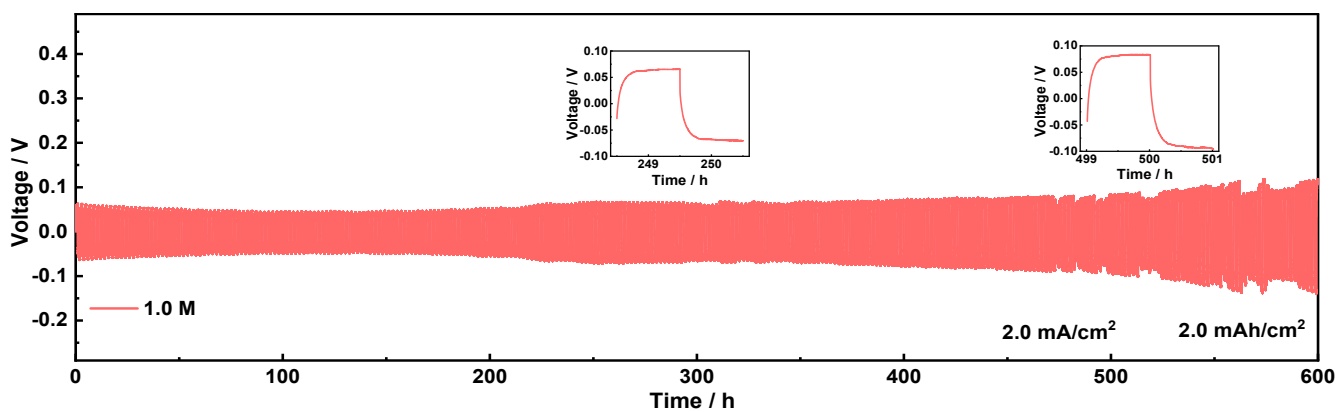

**Fig. S11** Cycling performance of the Zn||Zn symmetric cells at a current density of 2.0 mA·cm<sup>-2</sup> for 2 mAh·cm<sup>-2</sup> with 1.0 M ZnCl<sub>2</sub> electrolyte

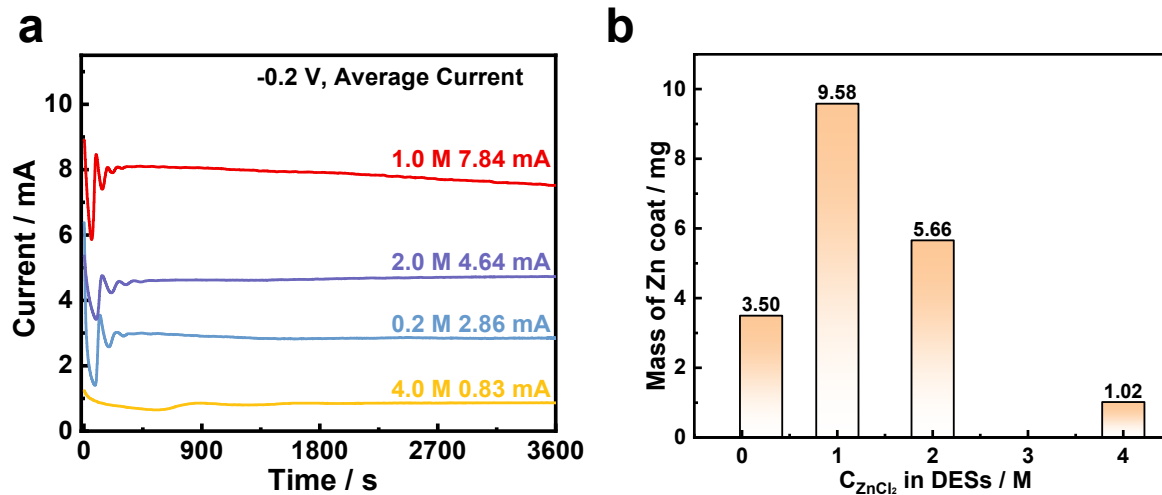

**Fig. S12** a) The current-time curves for -0.2 V (vs. Zn/Zn<sup>2+</sup>) over a duration of 3600 s at the various  $C_{ZnCl_2}$ ; b) The mass of Zn coating at the various  $C_{ZnCl_2}$ ;

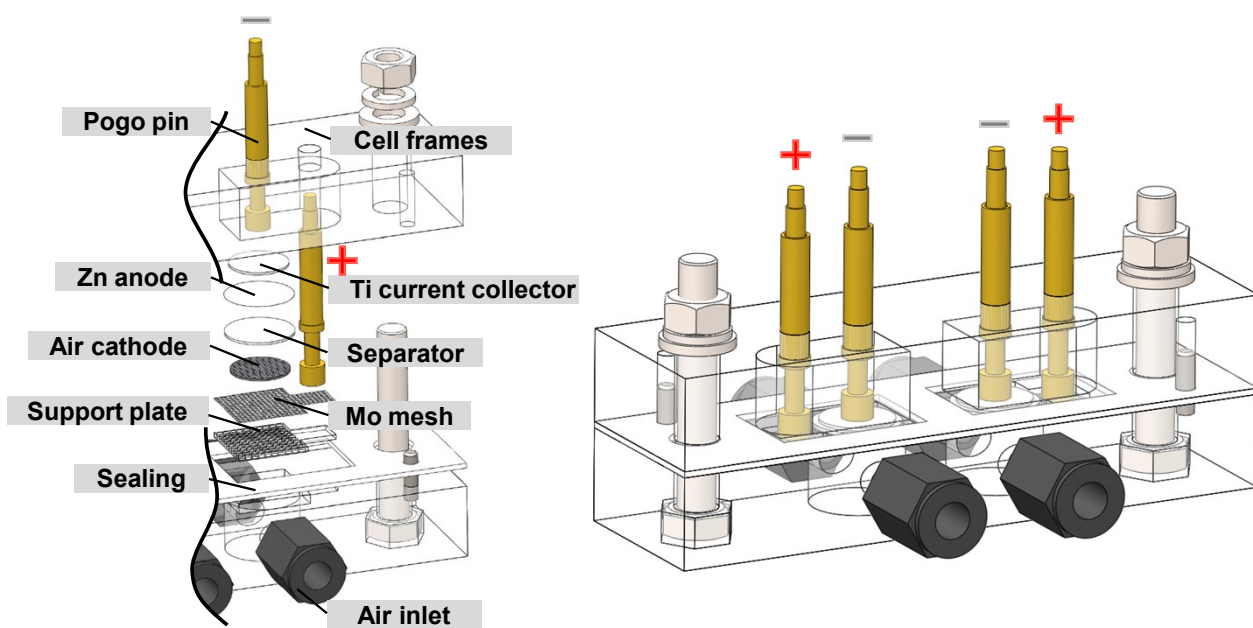

**Fig. S13** The schematic drawing of Zn-air cell set up in which the cathode is C loaded on a gas diffusion layer and the anode is Zn foil;



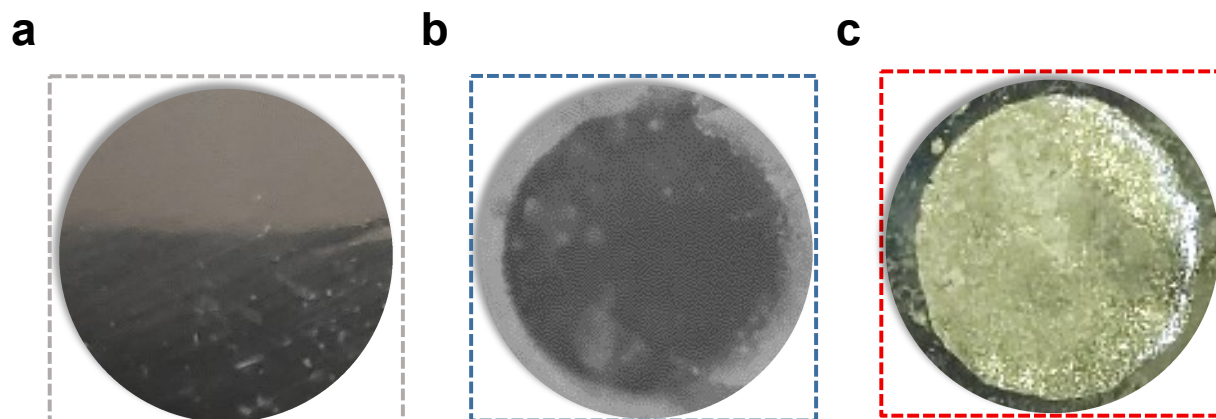

**Fig. S14** a) The photographs of the fresh Zn anode; b) The Zn anode after discharge in 6 M KOH + 0.2 M ZnCl<sub>2</sub>; c) The Zn anode after discharge 1.0 M ZnCl<sub>2</sub> DES electrolytes

## References

1. A. J. Bard, L. R. Faulkner and H. S. White, *Electrochemical methods: fundamentals and applications*, John Wiley & Sons, 2022.
2. R. Nagaishi, M. Arisaka, T. Kimura and Y. Kitatsuji, *J. Alloys Compd.*, 2007, **431**, 221-225.
3. S. A. Kuznetsov and M. Gaune-Escard, *J. Electroanal. Chem.*, 2006, **595**, 11-22.
4. X. L. Xie, X. L. Zou, X. G. Lu, C. Y. Lu, H. W. Cheng, Q. Xu and Z. F. Zhou, *Appl. Surf. Sci.*, 2016, **385**, 481-489.
5. H. Sato, M. Yui and H. Yoshikawa, *J. Nucl. Sci. Technol.*, 1996, **33**, 950-955.
6. L. S. Geng, J. S. Meng, X. P. Wang, C. H. Han, K. Han, Z. T. Xiao, M. Huang, P. Xu, L. Zhang, L. Zhou and L. Q. Mai, *Angew Chem Int Edit*, 2022, **61**.
7. H. Y. Qiu, X. F. Du, J. W. Zhao, Y. T. Wang, J. W. Ju, Z. Chen, Z. L. Hu, D. P. Yan, X. H. Zhou and G. L. Cui, *Nat. Commun.*, 2019, **10**.
8. J. W. Zhao, J. Zhang, W. H. Yang, B. B. Chen, Z. M. Zhao, H. Y. Qiu, S. M. Dong, X. H. Zhou, G. L. Cui and L. Q. Chen, *Nano Energy*, 2019, **57**, 625-634.
9. W. F. Wang, R. Y. Li, Z. Duan, J. J. Zhao, Y. D. Qi, Q. B. Guo, Q. M. Peng, D. S. Wang, S. M. Han and L. Zhang, *Chem. Eng. J.*, 2023, **456**.
10. J. Q. Shi, T. J. Sun, J. Q. Bao, S. B. Zheng, H. H. Du, L. Li, X. M. Yuan, T. Ma and Z. L. Tao, *Adv. Funct. Mater.*, 2021, **31**.
